# Supplementary material
Source: PubMed Central journal article supplement (PMC5775904)
Supplement: mic-163-554-s001.pdf [file mic-163-554-s001.pdf]

**Table S1. *E. coli* strains used in this study**

| Strains             | Genotype/relevant characteristics                                                                                                  | Source                    |
|---------------------|------------------------------------------------------------------------------------------------------------------------------------|---------------------------|
| BW25113             | wild type, weak swarmer                                                                                                            | Datsenko and Wanner, 2005 |
| CAT                 | <i>flhDC:cat:flhC:motA/Cm<sup>R</sup></i> , used as a wild type                                                                    | This study                |
| CAT_Km <sup>R</sup> | Km <sup>R</sup> , in a wild type background                                                                                        | This study                |
| CAT2                | $\Delta P_{flhDC-flhD-5'}-flhC$ ; $P_{flhDC}:flhD:flhC:cat$ located in the <i>intS/yfdG</i> intergenic region, used as a wild type | This study                |
| CAT_IS1             | CAT strain with IS1 upstream of the <i>flhD</i> promoter                                                                           | This study                |
| CAT_IS5             | CAT strain with IS5 upstream of the <i>flhD</i> promoter                                                                           | This study                |
| CAT_ $\Delta$ AB    | CAT, in which <i>motAB</i> is not expressed; this study nonmotile                                                                  |                           |
| CAT_ $\Delta$ fliC  | CAT, in which <i>flic</i> is not deleted; this study nonmotile                                                                     |                           |
| IS1(-107 rev)       | IS1 insertion into the -107 bp position relative to the <i>flhD</i> start site (+1) in reverse orientation                         | This study                |
| IS1(-120 rev)       | IS1 insertion into the -120 bp position relative to the <i>flhD</i> start site (+1) in reverse orientation                         | This study                |
| IS1(-180 rev)       | IS1 insertion into the -180 bp position relative to the <i>flhD</i> start site (+1) in reverse orientation                         | This study                |
| IS1(-214 rev)       | IS1 insertion into the -214 bp position relative to the <i>flhD</i> start site (+1) in reverse orientation                         | This study                |
| IS1(-415)           | IS1 insertion into the -415 bp position relative to the <i>flhD</i> start site (+1) in direct orientation                          | This study                |
| IS1(-469 rev)       | IS1 insertion into the -469 bp position relative to the <i>flhD</i> start site (+1) in reverse orientation                         | This study                |
| IS3(-199 rev)       | IS3 insertion into the -206 bp position relative to the <i>flhD</i> start site (+1) in reverse orientation                         | This study                |
| IS5(-99)            | IS5 insertion into the -99 bp position relative to the <i>flhD</i> start site (+1) in direct orientation                           | This study                |
| IS5(-99rev)         | IS5 insertion into the -99 bp position relative to the <i>flhD</i> start site (+1) in reverse orientation                          | This study                |
| IS5(-169)           | IS5 insertion into the -169 bp position relative to the <i>flhD</i> start site (+1) in direct orientation                          | This study                |
| IS5(-169 rev)       | IS5 insertion into the -169 bp position relative to the <i>flhD</i> start site (+1) in reverse orientation                         | This study                |
| IS5(-318)           | IS5 insertion into the -318 bp position relative to the <i>flhD</i> start site (+1) in direct orientation                          | This study                |
| IS5(-318rev)        | IS5 insertion into the -318 bp position relative to the <i>flhD</i> start site (+1) in reverse orientation                         | This study                |

**Table S2. Oligonucleotides used in this study**

| Name         | Sequence                                                                         | Use                                                                                                                  |
|--------------|----------------------------------------------------------------------------------|----------------------------------------------------------------------------------------------------------------------|
| PflhDC-Xho-F | atactcgagcttattctgtgaacttcaggtgac                                                | Amplification of the <i>flhDC</i> promoter                                                                           |
| PflhDC-Rn    | tgcagatcacacaaaactcaattac                                                        | Amplification of the <i>flhDC</i> promoter                                                                           |
| FlhC.cat-P1  | gatattatcccacaactgctggatgaacagagagtacaggtgtttaactgaaggagctaaggaa<br>gctaaaatggag | Integration of <i>cat</i> downstream of <i>flhC</i>                                                                  |
| FlhC.cat-P2  | catcatcctccactgttgaccatgacaggatgttcagtcgctcaggcgttaactgtgtaggctggag<br>ctgcttc   | Integration of <i>cat</i> downstream of <i>flhC</i>                                                                  |
| motA-ver-R   | gtagctggcgaagatctcgtctcac                                                        | Verification of <i>cat</i> integration                                                                               |
| flhC-Xho-F   | tatctcgagcggaatgattactgcaactttccagctgcaac                                        | Cloning the 3' region of <i>flhC</i> and the<br>5' region of <i>motA</i> to pKDT                                     |
| motA-Bam-R   | aatggatccgtatttgagcgcgacgaaacagcaacggcagc                                        | Cloning the 3' region of <i>flhC</i> and the<br>5' region of <i>motA</i> to pKDT                                     |
| PmotAB-P1    | gaattacaacagtactgcatgagtgccagggcggggcgtaaggcgcgccattgtgtaggctg<br>gagctgcttc     | Integration of the 3' region of <i>flhC</i><br>and the <i>flhC/motA</i> intergenic region<br>upstream of <i>motA</i> |
| PmotAB-P2    | gtatttgagcgcgacgaaacagcaacggcagc                                                 | Integration of the 3' region of <i>flhC</i><br>and the <i>flhC/motA</i> intergenic region<br>upstream of <i>motA</i> |
| ycaD-P1      | atcagacgcgatgcattgctctgaaagcatagacgggaaatagagttgctgtgtaggctggag<br>ctgcttc       | Insertion of <i>km<sup>r</sup></i> gene into <i>ycaD/intS</i><br>intergenic region                                   |
| ycaD-P2      | ggtgaaaatacgcgatatcccagcggcgggtattatcgatttatattaccatagaatcctccttag               | Insertion of <i>km<sup>r</sup></i> gene into <i>ycaD/intS</i><br>intergenic region                                   |
| ycaD-ver-R   | gccagagtcaacaaaagcaggc                                                           | Verification of <i>km<sup>r</sup></i> gene insertion into<br><i>ycaD/intS</i> intergenic region                      |
| Cat-Sal-R    | atagtcgacattacgccccgcctgccactc                                                   | Cloning <i>PflhDC-flhDC.cat</i> into pKDT                                                                            |
| intC-P1      | tgagaaggtggagtgagcgcacttaacaactatcgaatagcacaagtcttgtgtaggctggag<br>ctgcttc       | Integration of <i>PflhDC-flhDC.cat</i> into<br><i>intS/yfdG</i> intergenic region                                    |
| intC-P2      | ttctctatcagctaataatcaaaggaatgaagtctatcatccaagtcttcatgagaattaattccggg<br>gatcc    | Integration of <i>PflhDC-flhDC.cat</i> into<br><i>intS/yfdG</i> intergenic regions                                   |

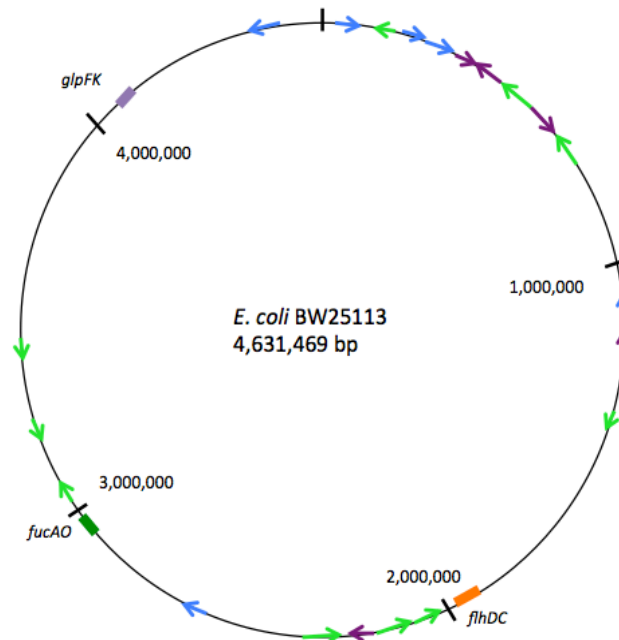

**Figure S1. Original locations of relevant IS elements on the *E. coli* K12 chromosome.** Figure S1

The original locations of IS elements and related genes at the beginning of this study are indicated on the *E. coli* K-12 BW25113 (GCA\_000750555.1) chromosome. Green arrows correspond to IS5, purple to IS3, and blue to IS1. The heads of the arrows indicate the orientations of transcription of the transposase genes. The *flhDC* operon is located between 1972344 and 1973236 bp.
